# Supplementary material for: Validation of the French version of the « Meta-Cognition Questionnaire » for adolescents (MCQ-Af): Evolution of metacognitive beliefs with age and their links with anxiety during adolescence
Source: PubMed Central journal article supplement (PMC7065794; doi:10.1371/journal.pone.0230171), 2020-03-11
Supplement: pone.0230171.s001.pdf [file pone.0230171.s001.pdf]

## S1 Appendix. MCQ-Af means and correlations

**Table A. Correlations between the 5 factors of the MCQ-Af27 and the MCQ-Af27 total score; N = 214.**

|                  | MCneg<br>- Q2 | Confidence<br>- Q12 | Control | Conscience<br>- Q14 | MCQ-Af27 |
|------------------|---------------|---------------------|---------|---------------------|----------|
| MCpos            | 0.41***       | 0.14*               | 0.33*** | 0.34***             | 0.71***  |
| MCneg - Q2       |               | 0.23**              | 0.32*** | 0.32***             | 0.71***  |
| Confidence - Q12 |               |                     | 0.19**  | 0.017               | 0.48***  |
| Control          |               |                     |         | 0.32***             | 0.68***  |
| Conscience - Q14 |               |                     |         |                     | 0.62***  |

In grey: non-significant correlation.

\*\*\* p < .001 \*\* p < .01 \* p < .05

**Table B. Comparison of means and standard deviations (SD) of the 5 factors of the MCQ-Af30 and MCQ-Af30 total score.**

|            | N = 214       | N = 197       | C-H<br>N = 166 | C-H<br>non-clinical n = 11 | C-H<br>clinical n = 11 |
|------------|---------------|---------------|----------------|----------------------------|------------------------|
| MCQ-Af30   | 61.48 (12.01) | 61.93 (11.93) | 58.5 (15.0)    | 54.09 (17.90)              | 69.82 (12.02)          |
| MCpos      | 11.29 (3.89)  | 11.37 (3.82)  | 10.7 (4.5)     | 10.72 (5.92)               | 9.73 (3.64)            |
| MCneg      | 12.03 (3.81)  | 12.40 (4.01)  | 12.4 (4.8)     | 10.18 (3.92)               | 18.45 (2.54)           |
| Confidence | 10.73 (3.83)  | 10.64 (3.61)  | 10.3 (3.7)     | 8.10 (2.17)                | 11.82 (4.42)           |
| Control    | 11.66 (3.67)  | 11.87 (3.73)  | 11.5 (3.6)     | 11.10 (3.86)               | 14.91 (3.48)           |
| Conscience | 15.75 (3.72)  | 15.65 (3.66)  | 13.9 (4.0)     | 14.00 (4.69)               | 15.36 (3.61)           |

Means in Cartwright-Hatton and al. (C-H) total sample N = 166, non-clinical and clinical subsamples n = 11 and our samples of N = 214 and N = 197. In grey significant differences in Cartwright-Hatton and al. (2004).

**Table C. Correlations between the 5 factors of the MCQ-Af27, MCQ-Af27 total score and anxiety score; N = 197.**

|                  | N = 197       |         |                     |                     |          | C-H<br>N = 143 |         |
|------------------|---------------|---------|---------------------|---------------------|----------|----------------|---------|
|                  | Mcneg<br>- Q2 | Control | Confidence<br>- Q12 | Conscience<br>- Q14 | MCQ-Af27 | RCMAS          | RCMAS   |
| MCpos            | 0.36***       | 0.33*** | 0.15*               | 0.34***             | 0.68***  | 0.35***        | 0.32*** |
| Mcneg - Q2       |               | 0.31*** | 0.02                | 0.30***             | 0.70***  | 0.56***        | 0.67*** |
| Control          |               |         | 0.06                | 0.30***             | 0.69***  | 0.31***        | 0.42*** |
| Confidence - Q12 |               |         |                     | 0.08                | 0.20**   | 0.16*          | 0.47*** |
| Conscience - Q14 |               |         |                     |                     | 0.61***  | 0.22**         | 0.35*** |
| MCQ-Af27         |               |         |                     |                     |          | 0.56***        | 0.62*** |

Correlations in Cartwright-Hatton and al. (C-H) N = 143 and our samples of N = 197. MCpos = positive metacognitive beliefs; MCneg = negative metacognitive beliefs. In grey: non significant correlations.

\*\*\* p < .001 \*\* p < .01 \* p < 0.05
